# Supplementary material for: Genome-Wide Association Study on Root System Architecture and Identification of Candidate Genes in Wheat (Triticum aestivum L.)
Source: MDPI journal article supplement (doi:10.3390/ijms23031843), 2022-02-06
Supplement: s1 [file s1]

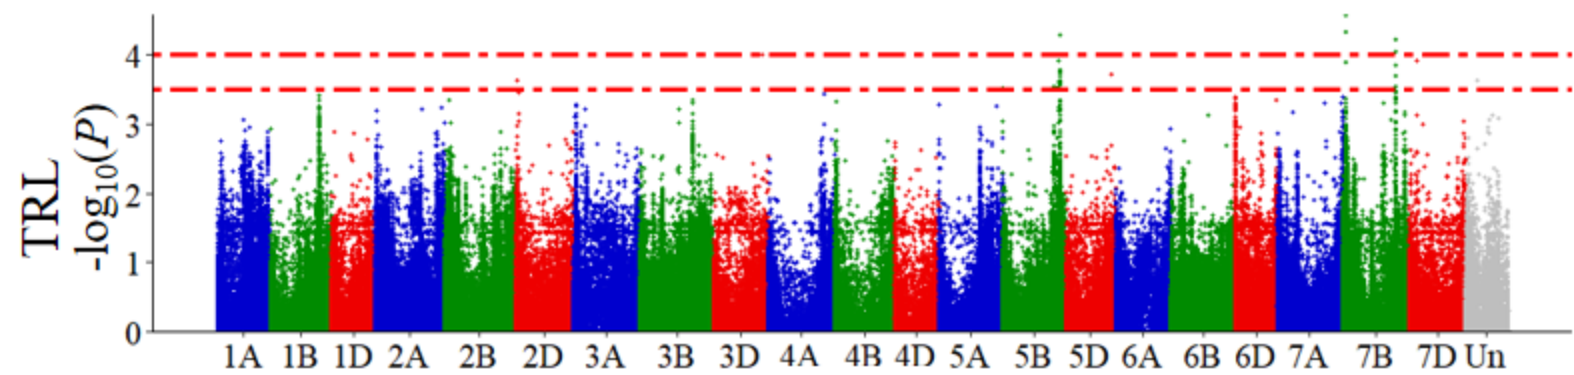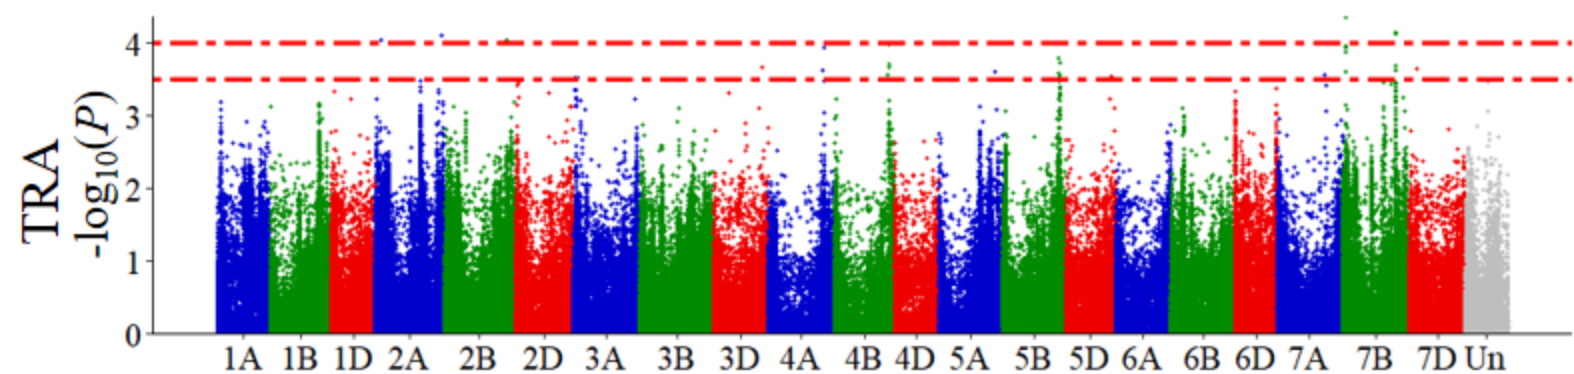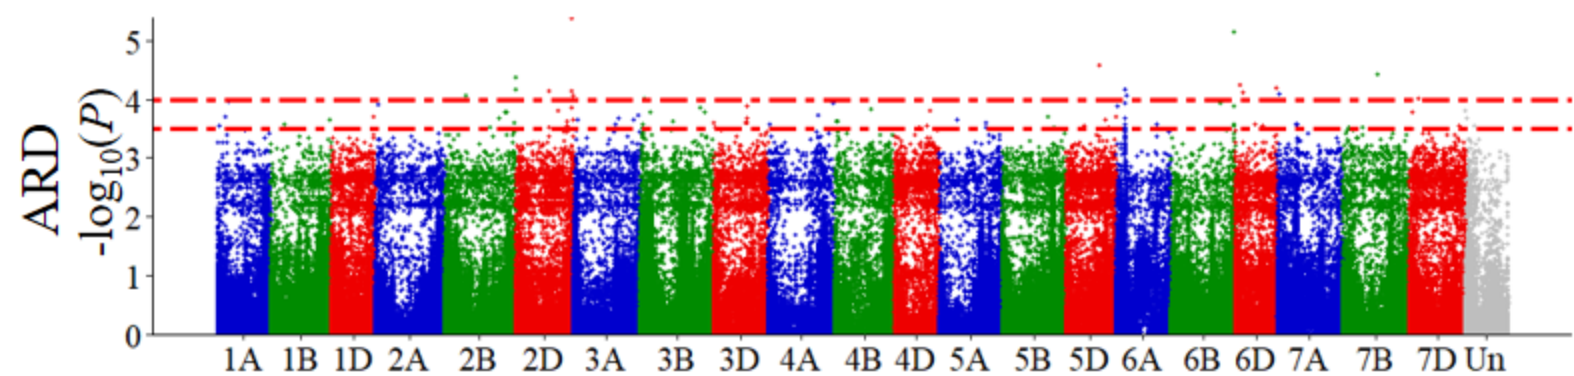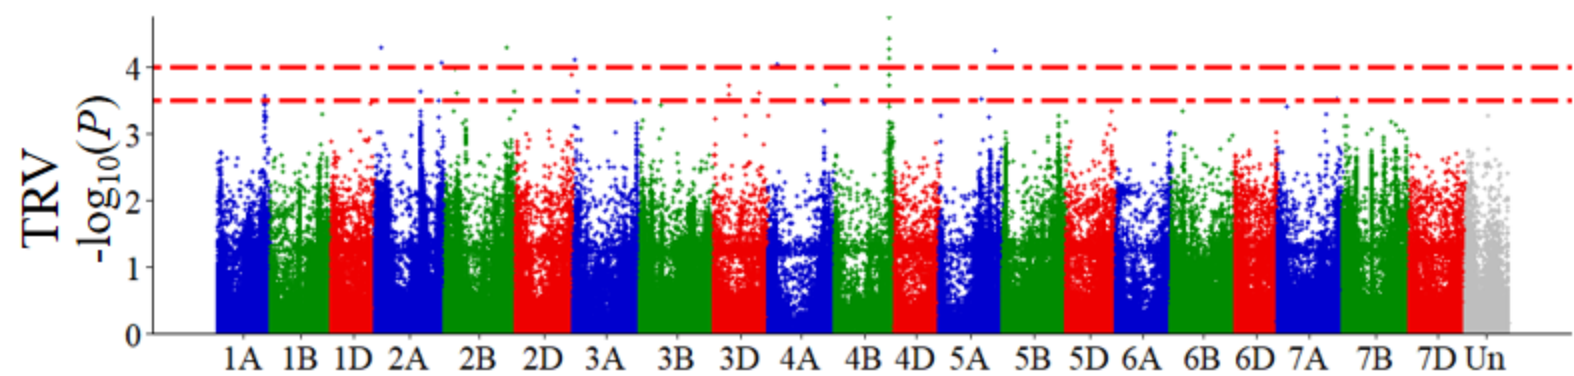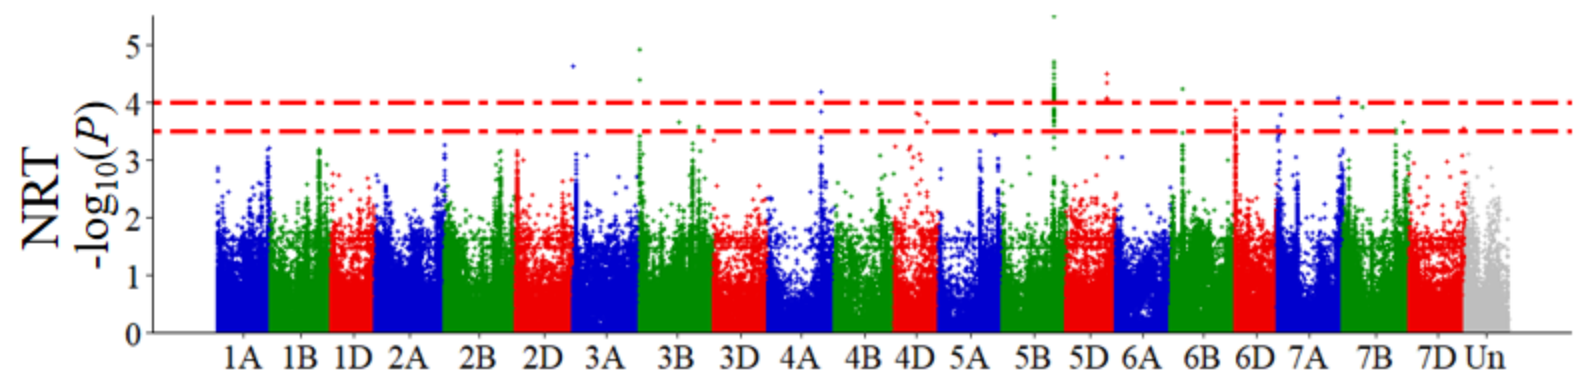

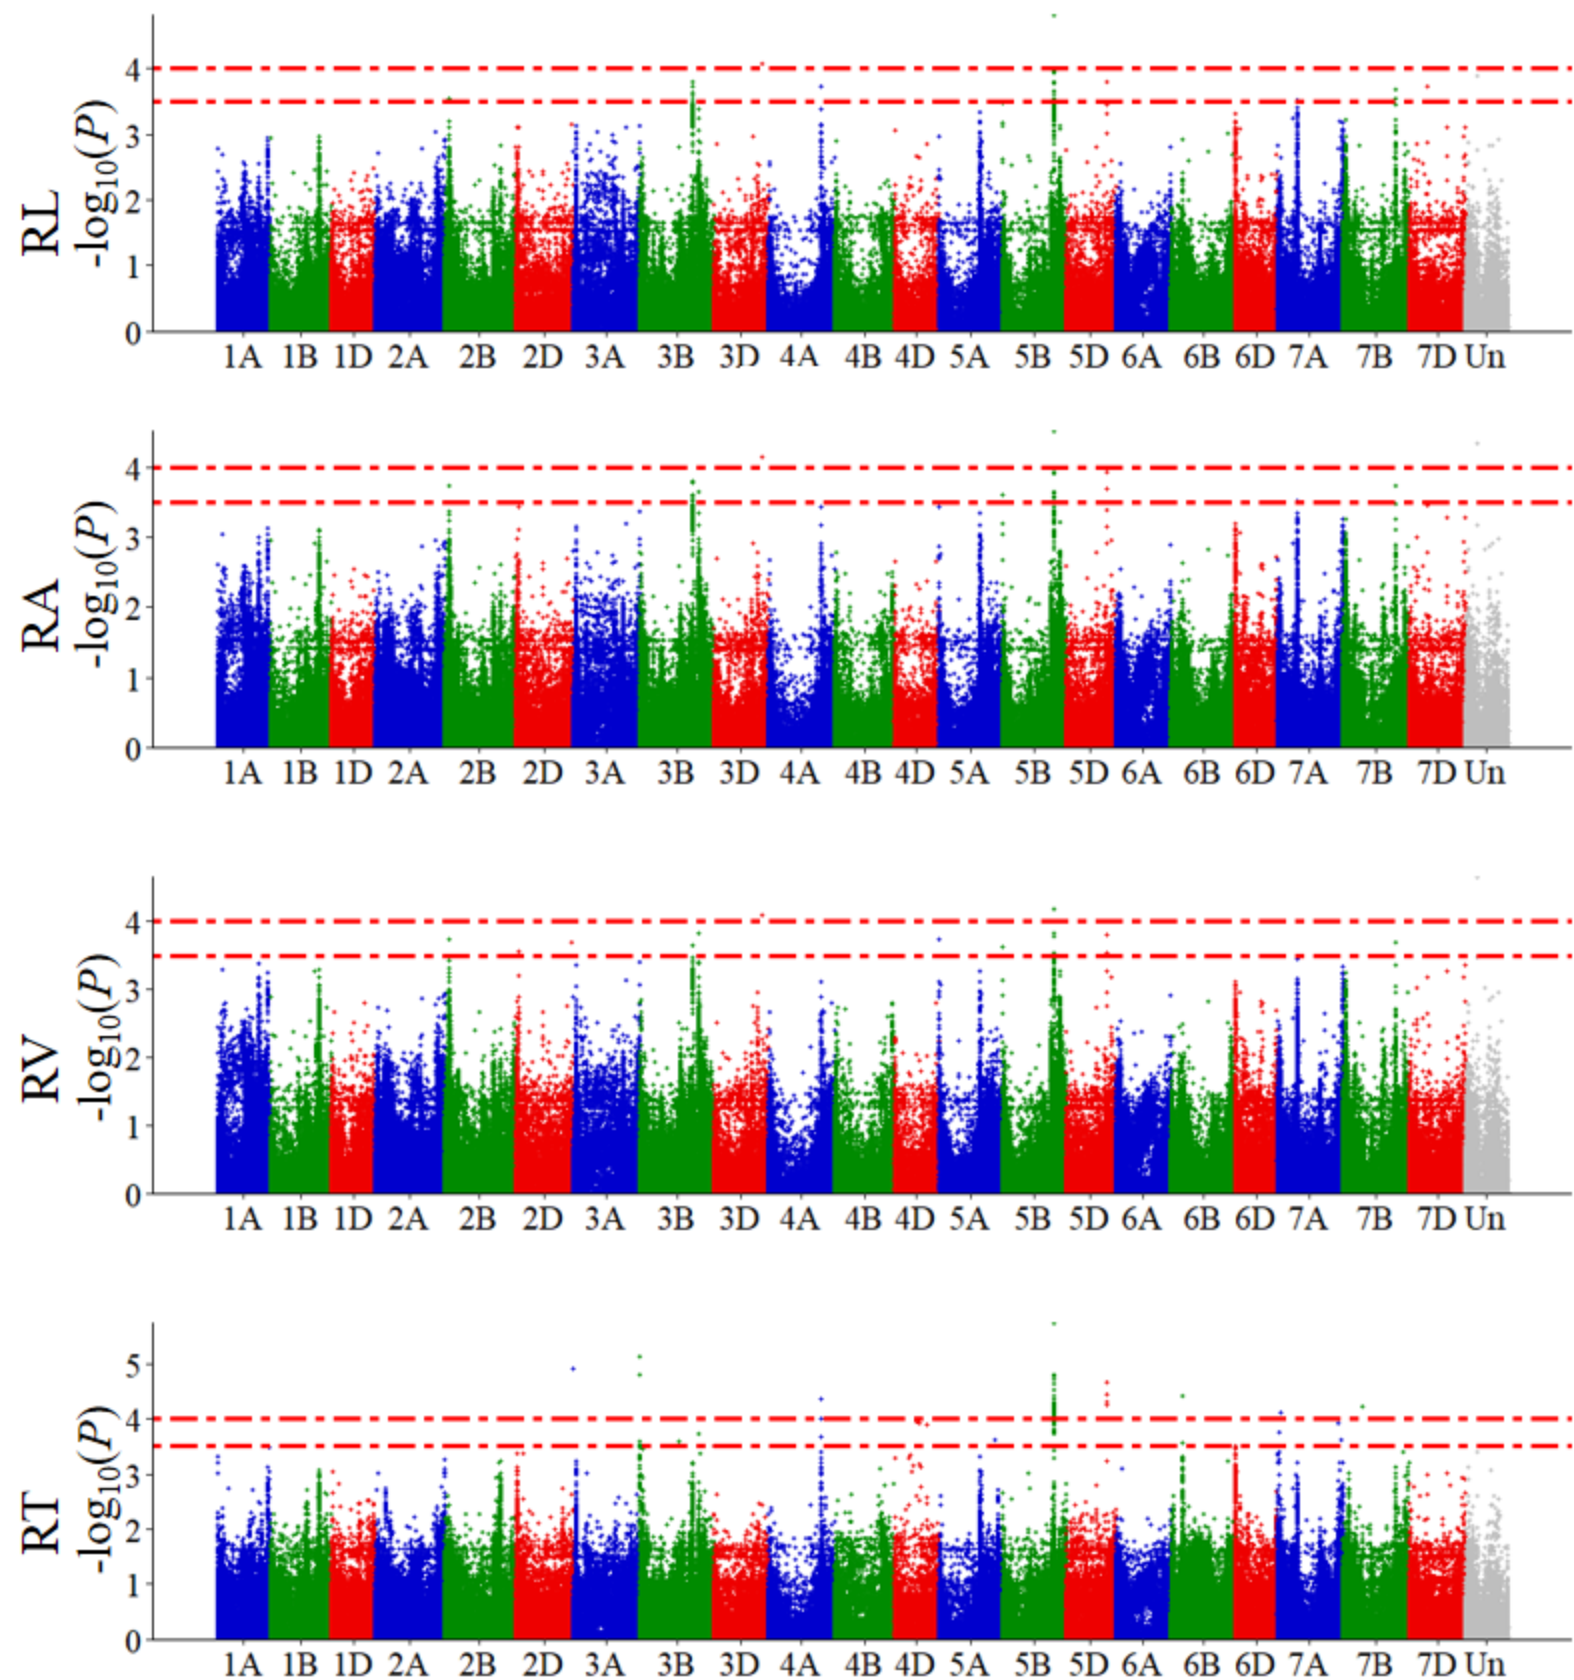

**Figure S2.** Genome-wide association study for RSA traits.

The dashed horizontal lines in red show the genome-wide significance threshold  $-\log_{10}(P\text{-value})$  of 3.5 and 4. The A, B and D sub-genomes are indicated in blue, green and red, respectively.
