# Supplementary figures and images for: Genome-Wide Association Study on Root System Architecture and Identification of Candidate Genes in Wheat (Triticum aestivum L.)
Source: MDPI journal article supplement (doi:10.3390/ijms23031843), 2022-02-06

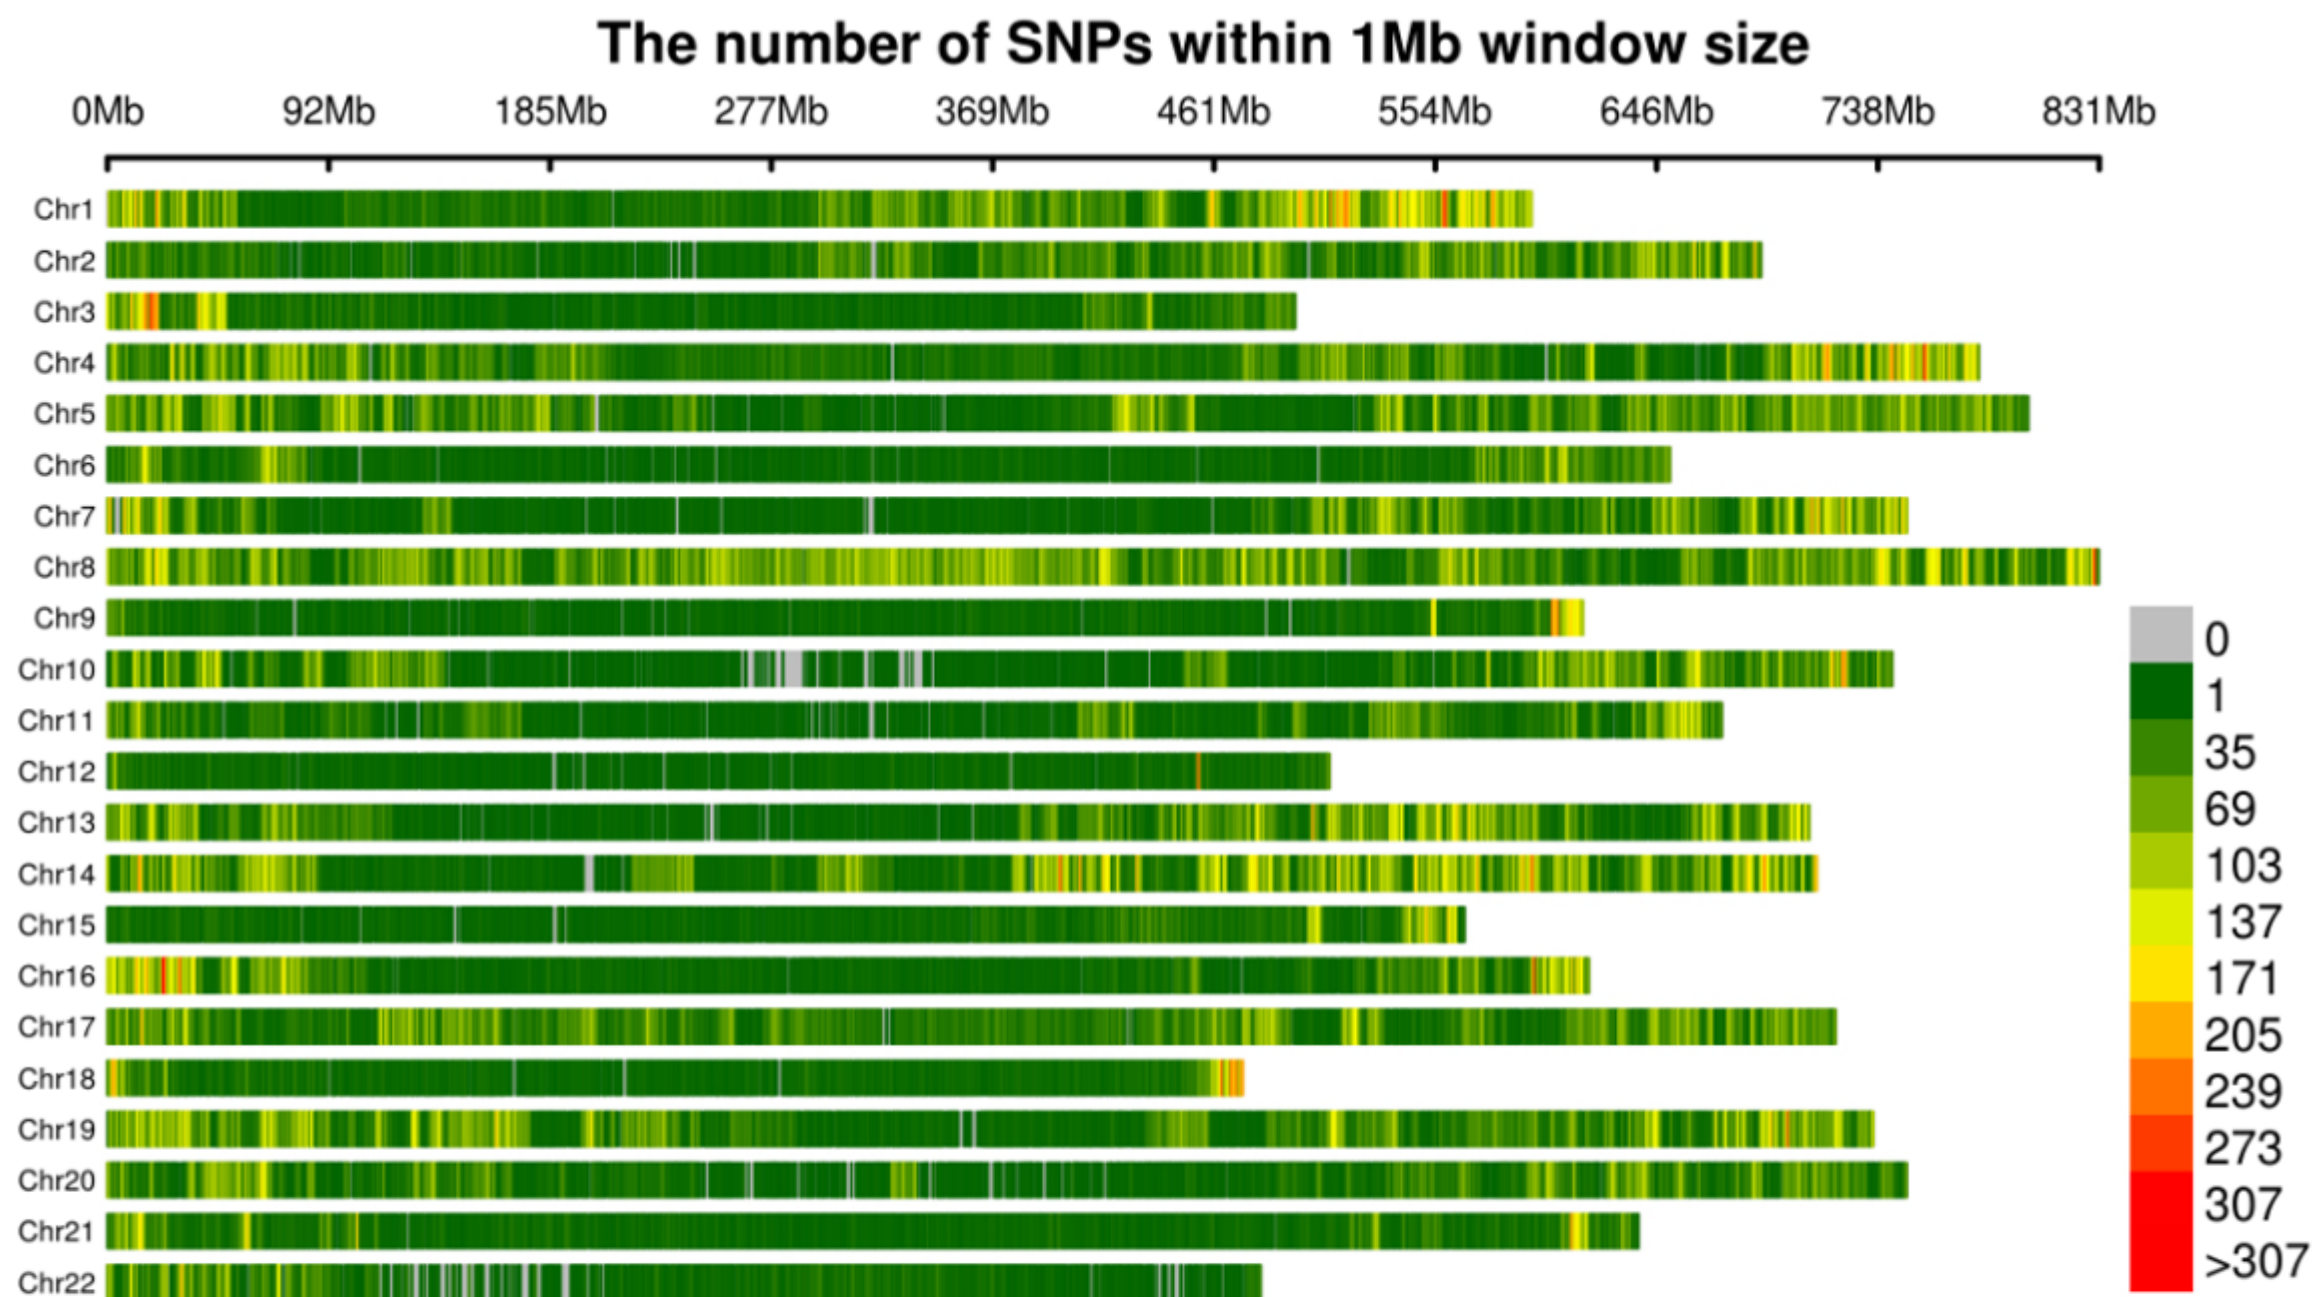

**Figure S1.** The number of SNPs within 1Mb window size.

Supplement: s1 [file s1]
